# Supplementary material for: The eQTL-missense polymorphisms of APOBEC3H are associated with lung cancer risk in a Han Chinese population
Source: PubMed Central journal article supplement (PMC4602211; doi:10.1038/srep14969), 2015-10-13
Supplement: srep14969-s1.pdf [file srep14969-s1.pdf]

# The eQTL-missense polymorphisms of *APOBEC3H* are associated with lung cancer risk in a Han Chinese population

Meng Zhu<sup>1,†</sup>, Yuzhuo Wang<sup>1,†</sup>, Cheng Wang<sup>1,†</sup>, Wei Shen<sup>1</sup>, Jia Liu<sup>1</sup>, Liguogeng<sup>1</sup>, Yang Cheng<sup>1</sup>, Juncheng Dai<sup>1,2</sup>, Guangfu Jin<sup>1,2</sup>, Hongxia Ma<sup>1,2</sup>, Zhibin Hu<sup>1,2</sup> and Hongbing Shen<sup>1,2\*</sup>

Supplementary Figure S1. The identified SNP rs139293 in UCSC Genome Browser.

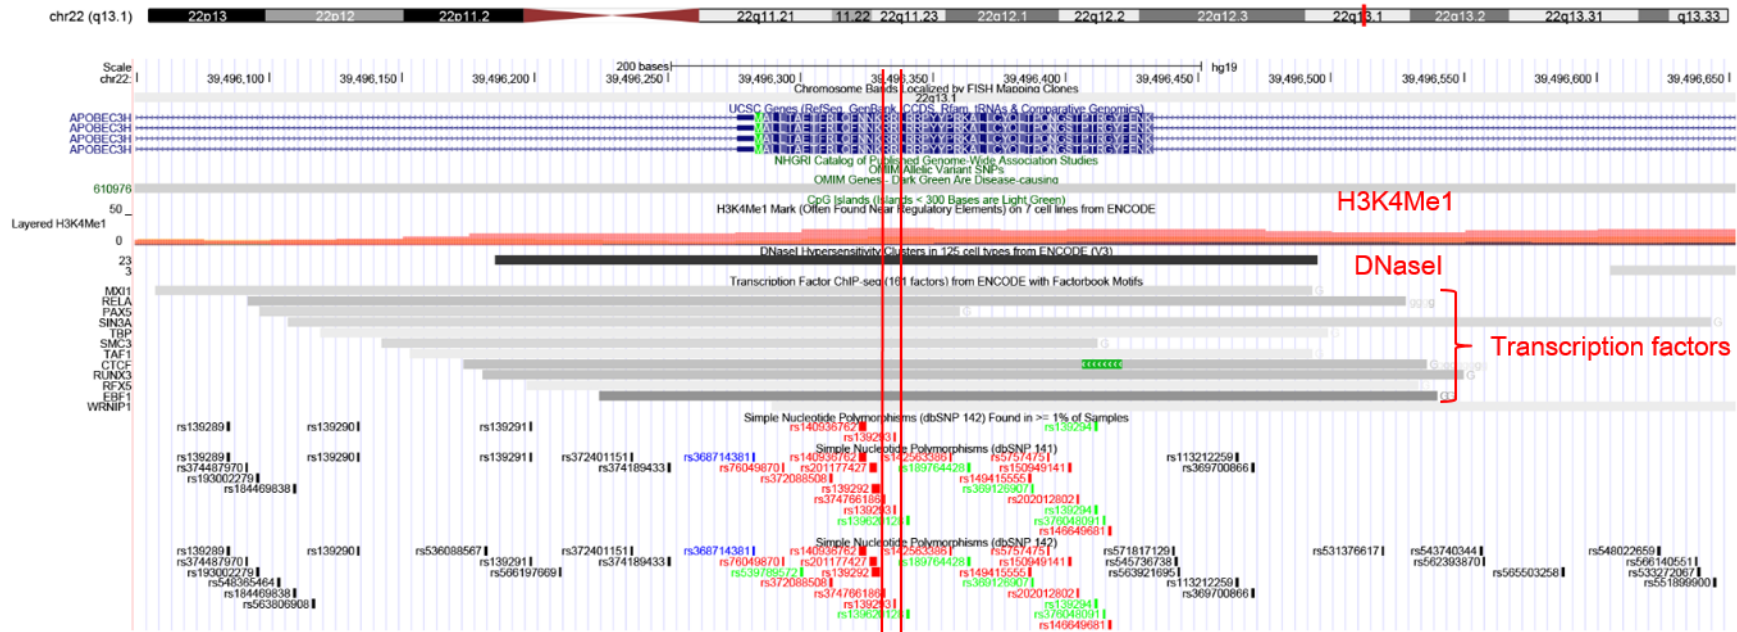

**Supplementary Figure S2. The Co-expression of *APOBEC3C* and *APOBEC3H* based on TCGA data.** a) Co-expression of *APOBEC3C* and *APOBEC3H* in lung tumour tissues. b) Co-expression of *APOBEC3C* and *APOBEC3H* in lung adjacent normal tissues. Spearman's rank correlation was used in this analysis.

a

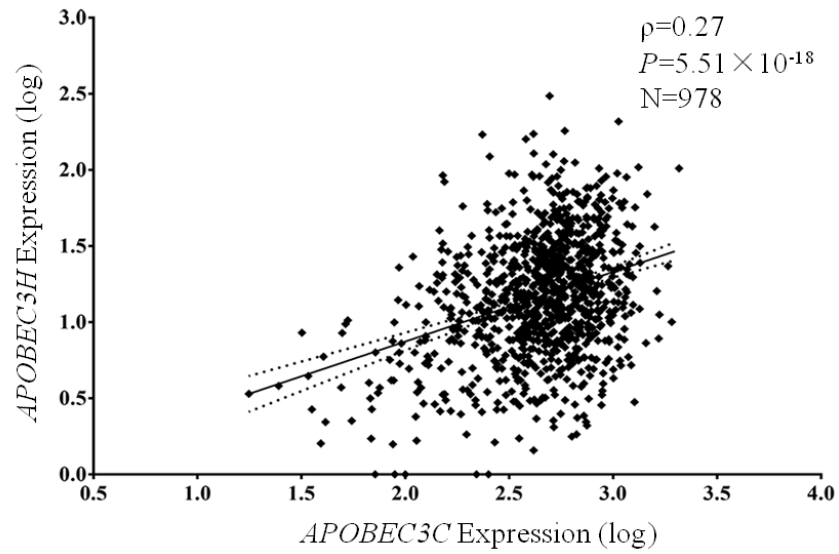

b

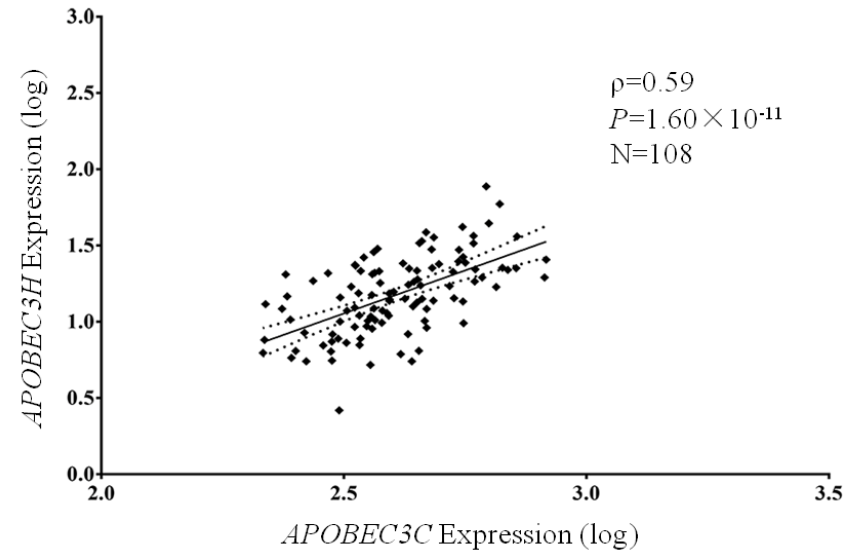

**Supplementary Table S1.** Variants located at the exons of *APOBEC* genes.

| Variant ID        | Region         | Position (hg19,bp) | Major/Minor | MAF <sup>a</sup> | Gene                   | Function        | SIFT <sup>b</sup> | Polyphen2 <sup>c</sup> |
|-------------------|----------------|--------------------|-------------|------------------|------------------------|-----------------|-------------------|------------------------|
| <b>rs10911390</b> | <b>1q25.3</b>  | <b>183616884</b>   | <b>C/T</b>  | <b>0.077</b>     | <b><i>APOBEC4</i></b>  | <b>missense</b> | <b>D</b>          | <b>B</b>               |
| rs1174657         | 1q25.3         | 183616926          | T/C         | 0.175            | <i>APOBEC4</i>         | missense        | T                 | B                      |
| rs10911391        | 1q25.3         | 183617094          | G/A         | 0.077            | <i>APOBEC4</i>         | missense        | T                 | B                      |
| rs1174658         | 1q25.3         | 183617105          | A/G         | 0.175            | <i>APOBEC4</i>         | missense        | T                 | B                      |
| rs10911392        | 1q25.3         | 183617311          | T/A         | 0.077            | <i>APOBEC4</i>         | synonymy        | .                 | .                      |
| rs12045762        | 1q25.3         | 183617413          | T/C         | 0.077            | <i>APOBEC4</i>         | synonymy        | .                 | .                      |
| <b>rs16861394</b> | <b>1q25.3</b>  | <b>183617693</b>   | <b>G/A</b>  | <b>0.077</b>     | <b><i>APOBEC4</i></b>  | <b>missense</b> | <b>D</b>          | <b>D</b>               |
| rs2073014         | 6p21.1         | 41029109           | T/C         | 0.237            | <i>APOBEC2</i>         | synonymy        | .                 | .                      |
| rs2076472         | 6p21.2         | 41029342           | T/C         | 0.247            | <i>APOBEC2</i>         | missense        | T                 | B                      |
| rs10431309        | 12p13.31       | 7803646            | G/A         | 0.320            | <i>APOBEC1</i>         | synonymy        | .                 | .                      |
| rs2302515         | 12p13.31       | 7805236            | G/C         | 0.392            | <i>APOBEC1</i>         | missense        | .                 | .                      |
| rs72487648        | 22q13.1        | 39357581           | C/T         | 0.284            | <i>APOBEC3A</i>        | synonymy        | .                 | .                      |
| rs2076109         | 22q13.1        | 39381826           | G/A         | 0.371            | <i>APOBEC3B</i>        | missense        | .                 | .                      |
| rs2076111         | 22q13.1        | 39381999           | C/T         | 0.387            | <i>APOBEC3B</i>        | synonymy        | .                 | .                      |
| rs1065184         | 22q13.1        | 39387558           | T/C         | 0.443            | <i>APOBEC3B</i>        | synonymy        | .                 | .                      |
| rs5750728         | 22q13.1        | 39440149           | T/C         | 0.289            | <i>APOBEC3F</i>        | missense        | .                 | .                      |
| rs5757465         | 22q13.1        | 39477123           | T/C         | 0.237            | <i>APOBEC3G</i>        | synonymy        | .                 | .                      |
| rs8177832         | 22q13.1        | 39477566           | A/G         | 0.062            | <i>APOBEC3G</i>        | missense        | T                 | B                      |
| <b>rs139293</b>   | <b>22q13.1</b> | <b>39496336</b>    | <b>G/T</b>  | <b>0.170</b>     | <b><i>APOBEC3H</i></b> | <b>missense</b> | <b>T</b>          | <b>D</b>               |
| rs139294          | 22q13.1        | 39496412           | G/C         | 0.345            | <i>APOBEC3H</i>        | synonymy        | .                 | .                      |
| rs139297          | 22q13.1        | 39497404           | G/C         | 0.309            | <i>APOBEC3H</i>        | missense        | T                 | B                      |
| rs139298          | 22q13.1        | 39497452           | A/G         | 0.309            | <i>APOBEC3H</i>        | missense        | T                 | B                      |
| <b>rs139299</b>   | <b>22q13.1</b> | <b>39497454</b>    | <b>G/C</b>  | <b>0.309</b>     | <b><i>APOBEC3H</i></b> | <b>missense</b> | <b>D</b>          | <b>B</b>               |
| rs139302          | 22q13.1        | 39498038           | G/C         | 0.340            | <i>APOBEC3H</i>        | missense        | T                 | B                      |

<sup>a</sup> Minor allele frequency of CHB from 1000 Genomes;

<sup>b</sup> Possible impact of an amino acid substitution on the structure and function of a human protein based on PolyPhen 2 HDIV, D: Probably damaging; P: Possibly damaging; B: Benign;

<sup>c</sup> Possible impact of an amino acid substitution on the structure and function of a human protein based on SIFT, D: Deleterious; T: Tolerated.

**Supplementary Table S2.** Rare variants in linkage disequilibrium with rs139293 in the exons of *APOBEC3H*.

| Variant ID  | Region  | Position (hg19,bp) | Major/Minor | MAF <sup>a</sup> | Amino acid change | Location | Polyphen2 <sup>b</sup> | SIFT <sup>c</sup> |
|-------------|---------|--------------------|-------------|------------------|-------------------|----------|------------------------|-------------------|
| rs112605061 | 22q13.1 | 39497412           | C/A         | 0.005            | p.Phe107Leu       | exon 3   | D                      | D                 |
| rs149415555 | 22q13.1 | 39496387           | C/T         | 0.005            | p.Thr35Met        | exon 2   | B                      | D                 |
| rs200886104 | 22q13.1 | 39499698           | C/A         | 0.005            | p.Ser183Tyr       | exon 6   | D                      | D                 |

<sup>a</sup> Minor allele frequency of CHB from 1000 Genomes;

<sup>b</sup> Possible impact of an amino acid substitution on the structure and function of a human protein based on PolyPhen 2 HDIV, D: Probably damaging; P: Possibly damaging; B: Benign;

<sup>c</sup> Possible impact of an amino acid substitution on the structure and function of a human protein based on SIFT, D: Deleterious; T: Tolerated.
